# Supplementary material for: Hierarchical CoMoS4 flakes with rich physico-electrochemical physiognomies for electrocatalytic oxygen evolution reaction
Source: Royal Society of Chemistry journal article supplement (doi:10.1039/d3nj00528c), 2023-01-01
Supplement: d3nj00528c1.pdf [file d3nj00528c1.pdf]

## Supplementary Information

### Hierarchical CoMoS<sub>4</sub> flakes with rich physico-electrochemical physiognomies for electrocatalytic oxygen evolution reaction

Yogesh Kumar Sonia,<sup>a</sup> Siddhant Srivastav<sup>a</sup> and Sumanta Kumar Meher<sup>\*a</sup>

<sup>a</sup>Materials Electrochemistry & Energy storage Laboratory, Department of Chemistry, Malaviya National Institute of Technology Jaipur, Rajasthan 302017, India

Email\*: skmeher.chy@mnit.ac.in

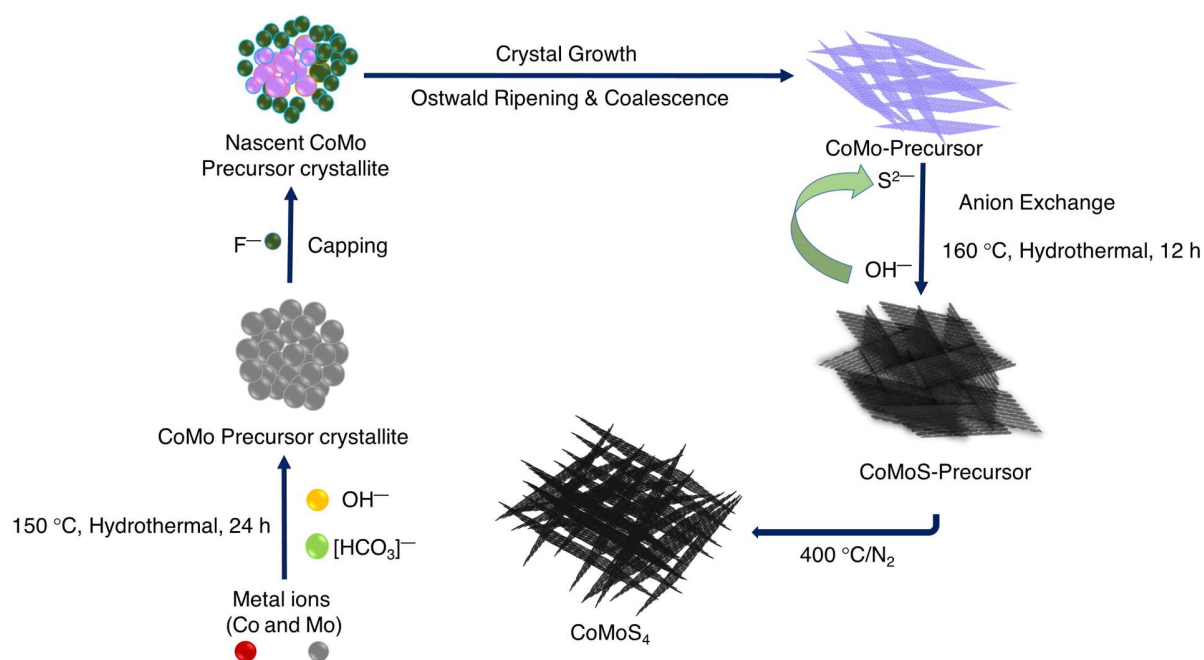

**Scheme 1.** Plausible mechanism for the formation of CoMoS<sub>4</sub> flake-like microstructure.

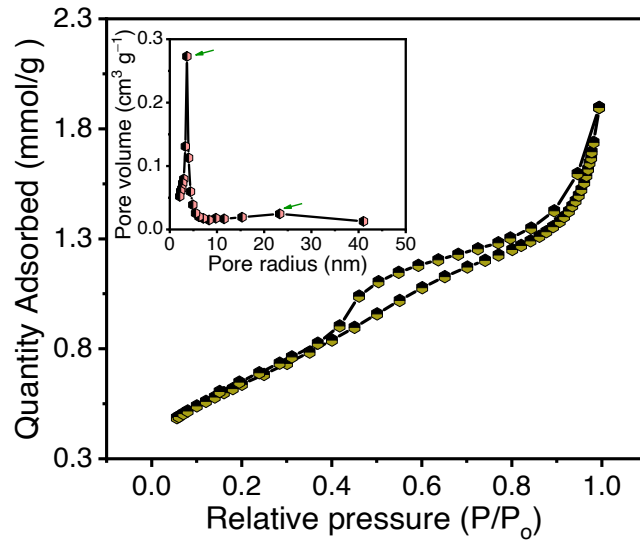

**Fig. S1** Nitrogen adsorption-desorption isotherm of CoMoS<sub>4</sub>; the BJH pore size distribution plot of CoMoS<sub>4</sub> is shown in the inset.

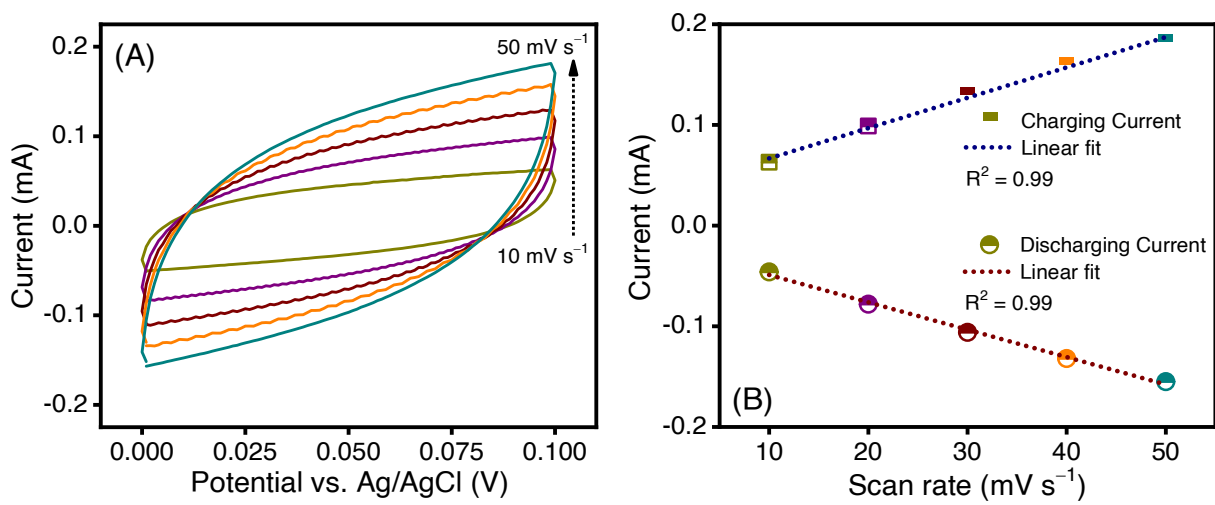

**Fig. S2.** (A) CV profiles of CoMoS<sub>4</sub> in non-Faradic potential region; (B) Charging current (anodic and cathodic current density) vs. scan rate plots for CoMoS<sub>4</sub>.

**Table S1.** The comparison of the electrocatalytic OER efficiency of the flake-like CoMoS<sub>4</sub> with the reported Co- and Mo-based sulfide/oxide electrocatalysts.

| <i>Sl. No.</i> | <i>Material</i>                                      | <i>Measured current density (mA cm<sup>-2</sup>)</i> | <i>Overpotential (mV)</i> | <i>Reference</i>    |
|----------------|------------------------------------------------------|------------------------------------------------------|---------------------------|---------------------|
| 1              | Li <sub>x</sub> MoO <sub>3</sub>                     | 10                                                   | 485                       | s1                  |
| 2              | Mo doped Mn <sub>2</sub> O <sub>3</sub>              | 10                                                   | 570                       | s2                  |
| 3              | FeSe <sub>2</sub> /CoSe <sub>2</sub> @CC             | 10                                                   | 407                       | s3                  |
| 4              | Mn <sub>2</sub> O <sub>3</sub>                       | 10                                                   | 730                       | s4                  |
| 5              | MoS <sub>2</sub> /NiS–Ni <sub>3</sub> S <sub>2</sub> | 10                                                   | 460                       | s5                  |
| 6              | CoS                                                  | 10                                                   | 440                       | s6                  |
| 7              | rGO/CoMoO <sub>4</sub>                               | 10                                                   | 475                       | s7                  |
| 8              | CoMoO <sub>4</sub>                                   | 8.93                                                 | 550                       | s8                  |
| 9              | CoMoS                                                | 10                                                   | 520                       | s9                  |
| 10             | CoSSIL/CNT                                           | 10                                                   | 410                       | s10                 |
| 11             | Ru doped MnO <sub>2</sub>                            | 10                                                   | 680                       | s11                 |
| 12             | CaMn <sub>x</sub> O <sub>y</sub>                     | 10                                                   | 550                       | s12                 |
| 13             | NiCo <sub>2</sub> O <sub>4</sub> /NiO                | 10                                                   | 430                       | s13                 |
| <b>14</b>      | <b>Flake-like CoMoS<sub>4</sub></b>                  | <b>10</b>                                            | <b>430</b>                | <b>Present work</b> |

## References

- s1 S. Cao, J. Qi, F. Lei, Z. Wei, S. Lou, X. Yang, Y. Guo, P. Hao, J. Xie, and B. Tang, *Chem. Eng. J.*, 2021, **413**, 127540.
- s2 S. E. Balaghi, C. A. Triana and G. R. Patzke, *ACS Catalysis*, 2020, **10**, 2074–2087
- s3 B. Fei, Z. Chen, Y. Ha, R. Wang, H. Yang, H. Xu and R. Wu, *Chem. Eng. J.*, 2020, **394**, 124926.
- s4 Y. Wang, Ying, H. Tianjun Hu, C. Yan Chen, Y. Hongjie, and Q. Yanting Qiao. *Int. J. Hydrogen Energy* 2020, **45**, 22744–22751.

- s5 Y. Guan, X. Haicheng Xuan, L. Hongsheng and H. Peide *Electrochim. Acta*, 2019, **320**, 134614.
- s6 K. Prabakaran, M. Lokanathan and B. Kakade, *Appl. Surf. Sci.*, 2019, **466**, 830–836.
- s7 J. Ahmed, M. Ubaidullah, T. Ahmad, N. Alhokbany and S. M. Alshehri, *ChemElectroChem*, 2019, **6**, 2524–2530.
- s8 Z. Liu, Zailun, Y. Chen Yuan, and T. Fei Teng, *J. Alloys Compd.*, 2019, **781**, 460–466.
- s9 X. Zhang, P. Ding, Y. Sun, X. Li, H. Li and J. Guo, *J. Alloys Compd.*, 2018, **731**, 403–410.
- s10 Y. Ding, A. Klyushin, X. Huang, T. Jones, D. Teschner, F. Girgsdies, T. Rodenas, R. Schlögl and S. Heumann, *Angew. Chem.*, 2018, **57**, 3514–3518.
- s11 M. Lübke, A. Sumboja, L. McCafferty, C. F. Armer, A. D. Handoko, Y. Du, K. McColl, F. Cora, D. Brett, Z. Liu and J. A. Darr, *ChemistrySelect*, 2018, **3**, 2613–2622.
- s12 H. Simchi, K. A. Cooley, J. Ohms, L. Huang, P. Kurz and S. E. Mohny, *Inorg. Chem.*, 2018, **57**, 785–792.
- s13 Y. Wang, Z. Zhang, X. Liu, F. Ding, P. Zou, X. Wang, Q. Zhao and H. Rao, *ACS Sustain. Chem. Eng.*, 2018, **6**, 12511–12521.
